# Supplementary material for: HilE represses the activity of the Salmonella virulence regulator HilD via a mechanism distinct from that of intestinal long-chain fatty acids
Source: PubMed Central journal article supplement (PMC10696396; doi:10.1016/j.jbc.2023.105387), 2023-10-27
Supplement: mmc2.pdf [file mmc2.pdf]

## **HilE represses the activity of the *Salmonella* virulence regulator HilD via a mechanism distinct from that of intestinal long-chain fatty acids.**

Joe D. Joiner, Wieland Steinchen, Nick Mozer, Thales Kronenberger, Gert Bange, Antti Poso, Samuel Wagner, Marcus D. Hartmann.

### **List of Supporting Material Contained within this Document**

**Supplementary Text.** Effect of Pluronic on MST binding affinity measurements.

**Table S1.** Affinity values for the binding of LCFAs to HilD in presence of Pluronic.

**Table S2.** Molecular weight values determined from additional SEC-MALS runs.

**Table S3.** Primers used for Round-the-Horn PCR.

**Supplementary Figures S1-S11.**

### **Other Supporting Material for this Manuscript**

**Dataset S1.** Overview HDX-MS conditions and deuterium incorporation of peptides.

**Dataset S2.** Predicted AlphaFold Multimer structures of the HilD-HilD homodimer.

**Dataset S3.** Predicted AlphaFold Multimer structures of the HilD-HilE heterodimer.

## Effect of Pluronic on Calculated Binding Affinities from MST Measurements

Due to encountered issues with protein aggregation and adsorption to capillaries in MST assays, Pluronic F-127 was initially added to MST buffers, to a final assay concentration of 0.05%. Whilst this had only a minor effect on the calculated binding affinities for HiID homodimerisation or HiID/HiIE binding affinity (Fig. S11), we found that the presence of Pluronic resulted in much higher  $K_d$  values (and underestimation of the affinity) for the binding of fatty acids (Table S1, Fig. S4). Hence, Pluronic was omitted from MST assay buffer for runs determining affinities of LCFAs to HiID. The trends in binding affinity of different LCFAs in the presence of Pluronic are similar to those obtained without Pluronic in both MST and EMSA experiments. We hypothesise that this effect is due to the incorporation of the LCFAs into micelles formed by Pluronic in aqueous buffers, reducing the amount of free LCFAs in solution to below the expected concentration, and resulting in the underestimation of binding affinities.

**Table S1. Affinity values for the binding of LCFAs to HiID in presence of Pluronic.**

| Lipid            | Shorthand Nomenclature | $K_d \pm SD$ ( $\mu\text{M}$ ) |
|------------------|------------------------|--------------------------------|
| Myristoleic Acid | 9Z-14:1                | 566.7 $\pm$ 59.5               |
| Palmitoleic Acid | 9Z-16:1                | 58.53 $\pm$ 4.86               |
| Oleic Acid       | 9Z-18:1                | 48.06 $\pm$ 5.27               |
| Gadoleic Acid    | 9Z-20:1                | 26.68 $\pm$ 3.13               |
| Erucic Acid      | 13Z-22:1               | 14.71 $\pm$ 2.19               |
| Nervonic Acid    | 15Z-24:1               | 17.99 $\pm$ 1.84               |
| Methyl Oleate    | 9Z-18:1                | 738.5 $\pm$ 276.1              |

$K_d$  values were calculated from changes in normalised fluorescence ( $\Delta F_{\text{norm}}$ ) at an MST on-time of 1.5 seconds with increasing ligand concentrations, from at least 3 replicates. Replicates were merged and the standard deviation calculated using the MO.Affinity Analysis v2.3 software (NanoTemper Technologies GmbH).

**Table S2. Molecular weight values determined from additional SEC-MALS runs (shown in Fig. S8).**

| Protein Sample                | Oligomerisation State | Molecular Mass (kDa) |          |       |
|-------------------------------|-----------------------|----------------------|----------|-------|
|                               |                       | Theoretical          | SEC-MALS |       |
| HiIC                          | Dimer                 | 68.0                 | 69.3     | ± 0.9 |
| HiIE                          | Monomer               | 16.9                 | 23.2     | ± 3.6 |
| HiIC + HiIE                   | Peak 1 (HiIC)         | 68.0                 | 70.4     | ± 0.6 |
|                               | Peak 2 (HiIE)         | 16.9                 | 24.2     | ± 1.6 |
| HiID <sub>31-309</sub>        | Dimer                 | 63.6                 | 62.4     | ± 0.6 |
| HiID <sub>31-309</sub> + HiIE | 1:1 complex           | 48.8                 | 48.9     | ± 0.2 |
| HiID S216I/S218D              | Dimer                 | 70.4                 | 67.8     | ± 1.1 |
| HiID S216I/S218D + HiIE       | 1:1 complex           | 52.1                 | 52.5     | ± 0.6 |
| HiID K279M                    | Dimer                 | 70.4                 | 69.4     | ± 0.7 |
| HiID K279M + HiIE             | 1:1 complex           | 52.1                 | 52.9     | ± 0.9 |

**Table 3. Primers used for Round-the-Horn PCR.**

| Primer       | Sequence                           |
|--------------|------------------------------------|
| HiID_NTD_fwd | 5'-TAAAAGCTTGCGGCCGCACTCGAG-3'     |
| HiID_NTD_rev | 5'-CGTTATCTGAGCCGAGCTAAGGATGATC-3' |
| His-NTD_fwd  | 5'-GTAAGTAATAGTCATCAGCGTCCTGC-3'   |
| His-NTD_rev  | 5'-CGAACCATGGTGATGATGGTGATGA-3'    |

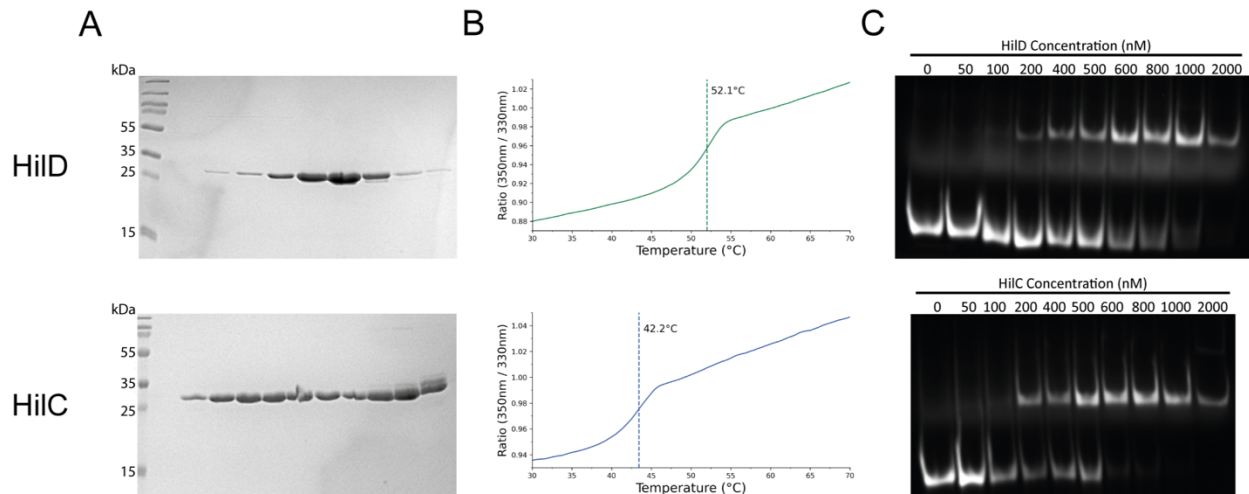

**Figure S1. Biophysical characterisation of HiID and HiIC.** (A) Coomassie-stained SDS-PAGE gel for fractions eluted from the final purification step of HiID (top) and HiIC (bottom). (B) NanoDSF unfolding profile of HiID (green, top) and HiIC (blue, bottom). A concentration of 20  $\mu$ M was used for both proteins. (C) EMSAs showing binding of HiID (top) and HiIC (bottom) to the *hilA* promoter. All lanes contain 50 nM of a DNA fragment encompassing the A1 HiID binding site within the promoter and increasing protein concentrations, as indicated. DNA is labelled with a Cy5 fluorophore at the 5' end of the forward strand for image detection.

**A**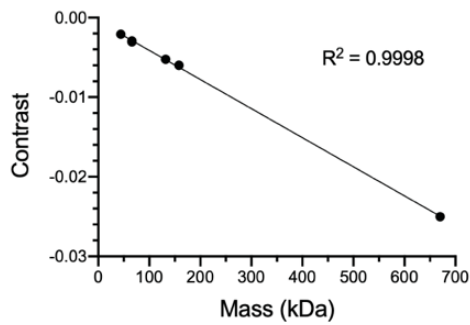**B**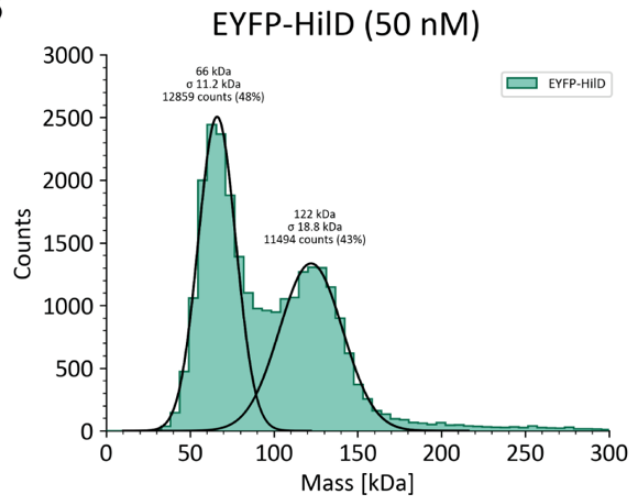

**Figure S2. EYFP-HiID exists as a mixture of monomers and dimers at concentrations used for MST assays.** (A) Mass calibration curve composed of BSA (66 and 132 kDa), ovalbumin (44 kDa),  $\gamma$ -globulin (158 kDa) and thyroglobulin (670 kDa). (B) Mass photometry mass distribution plot of EYFP-HiID (50 nM). Data is a cumulative distribution from 8 individual measurements. The number of landing events (counts) is displayed as a histogram, along with the peaks fitted by Gaussian curves. Calculated molecular weight values, standard deviation ( $\sigma$ ) and the number of events within the Gaussian fit are displayed.

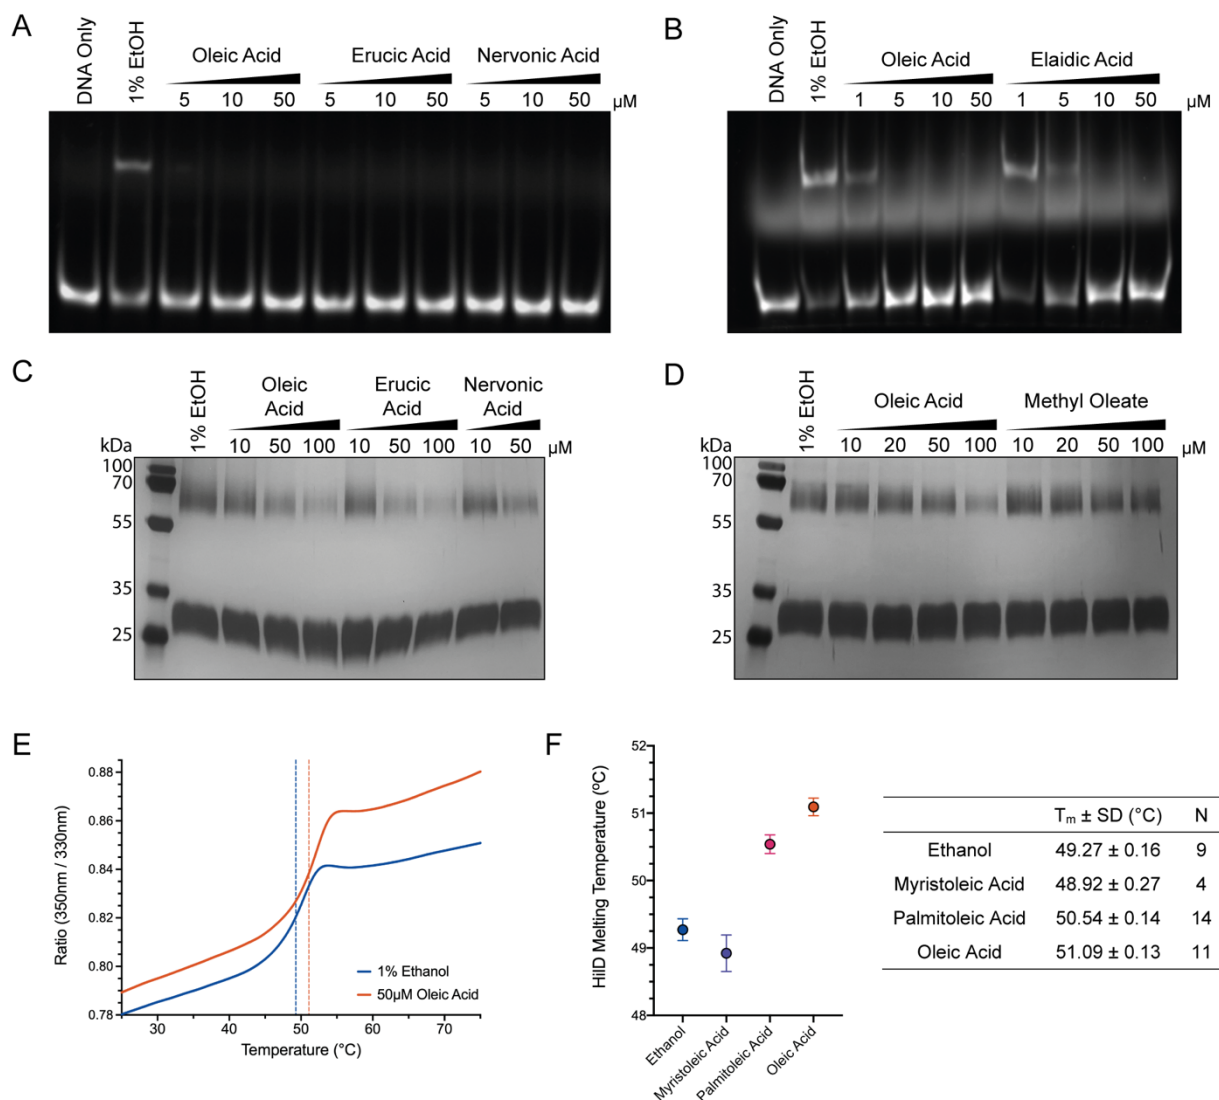

**Figure S3. LCFAs stabilise the monomeric form of HiID.** (A-B) EMSAs showing the inhibition of HiID DNA binding by LCFAs. HiID (600 nM) was incubated with *hilA* promoter DNA (50 nM) and LCFAs at the indicated concentrations. (C-D) BS<sup>3</sup> cross-linking of HiID in the presence of different fatty acids. HiID (10  $\mu\text{M}$ ) was incubated with fatty acids (or ethanol) at the indicated concentrations prior to crosslinking with BS<sup>3</sup>. (E) NanoDSF unfolding profiles of HiID (20  $\mu\text{M}$ ) when incubated with either 1% ethanol (blue) or 50  $\mu\text{M}$  oleic acid (orange). Traces show the average fluorescent readout obtained from N technical replicates, as listed in (F). Dashed vertical lines indicate the calculated HiID melting temperature for each sample. (F) Melting temperature of HiID in the presence of different LCFAs. Data represent mean  $\pm$  SD of N technical replicates.

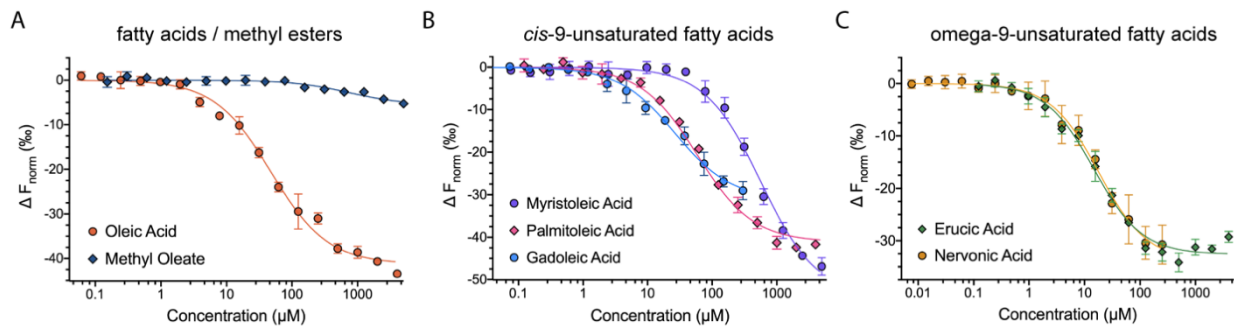

**Figure S4. Dose-response curves for LCFA binding to HiID in presence of Pluronic.** MST binding curves for fatty acid binding to HiID: **(A)** oleic acid and methyl oleate; **(B)** *cis*-9-unsaturated fatty acids; **(C)** omega-9-unsaturated fatty acids. Data represent  $K_d \pm SD$  calculated from at least 3 replicates. Calculated affinities are displayed in Table S1.

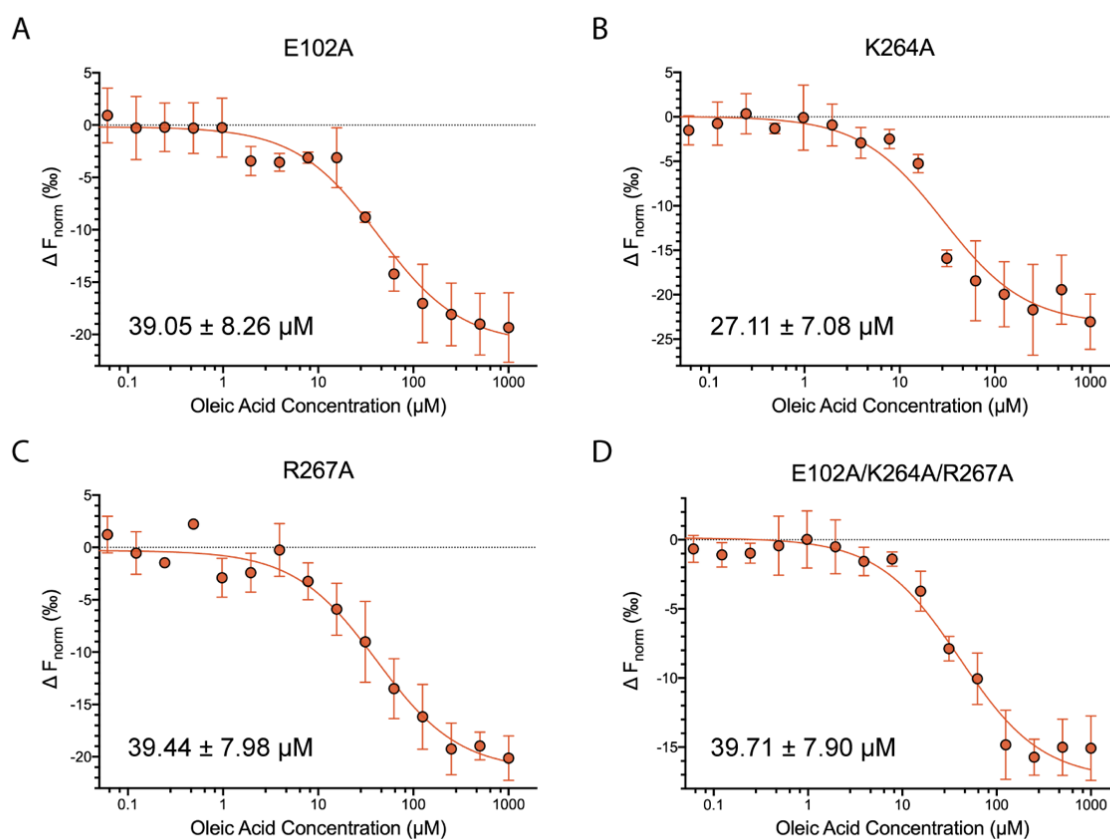

**Figure S5. Dose-response curves for oleic acid binding to HiID mutants.** MST binding curves for oleic acid binding to HiID mutants: **(A)** E102A, **(B)** K264A, **(C)** R267A, **(D)** E102A/K264A/R267A. Calculated  $K_d$  affinity values are shown in  $\mu\text{M}$ . Data represent mean  $\pm$  SD from 4 replicates.

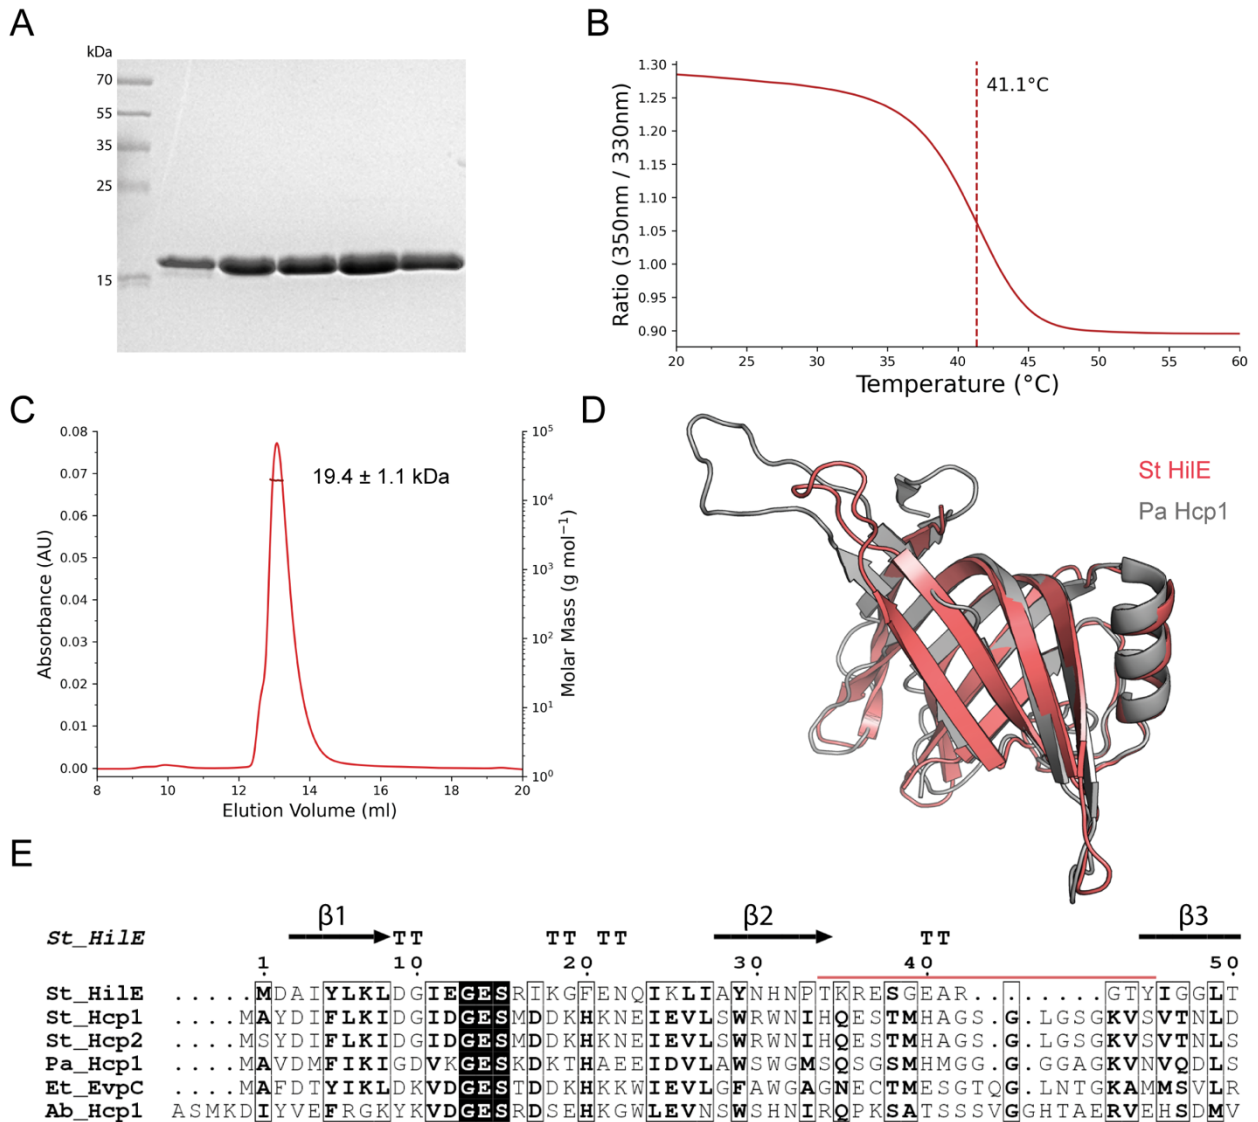

**Figure S6. HiIE exists exclusively as a monomer in solution.** (A) Coomassie-stained SDS-PAGE gel for fractions eluted from the final purification step of HiIE. (B) NanoDSF unfolding profile of HiIE ( $1 \text{ mg ml}^{-1}$ ). (C) SEC-MALS elution profile of HiIE. HiIE ( $100 \mu\text{M}$ ) was loaded to a S75 10/300 increase column, and absorbance was constantly monitored at 280 nm. Molecular mass of the eluted protein was calculated from the static light scattering. (D) Structural alignment of HiIE (tfold prediction, red) with *Pseudomonas aeruginos* Hcp1 (PDB: 1Y12; grey). (E) Multiple sequence alignment of Hcp proteins, identified using HHPred, was performed using Clustal $\Omega$  and highlights the shortened length of the loop in HiIE (residues constituting the loop in HiIE are marked by the red line).  $\beta$ -strands, as predicted in the structure of HiIE, are denoted by the arrows above the alignment.



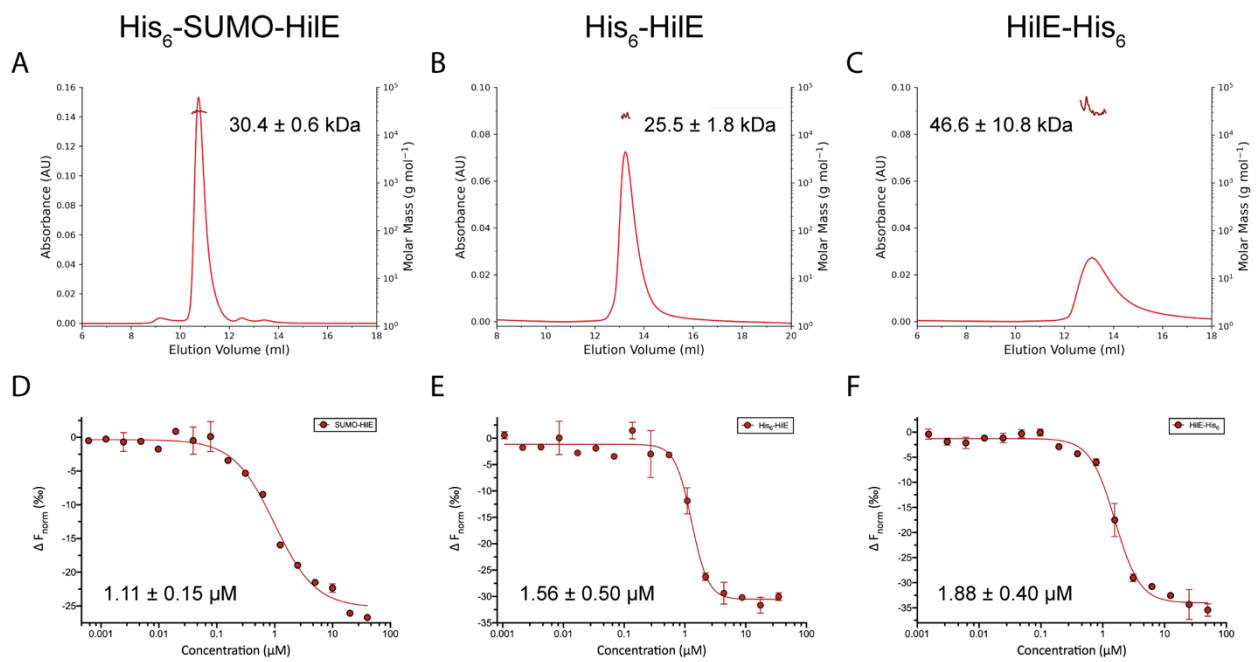

**Figure S7. Oligomerisation and activity of additional purified HiE constructs. (A-C)** SEC-MALS elution profiles of the three purified HiE constructs. Molecular weight values from light scattering measurements were calculated from three replicate runs for each construct. **(D-F)** Corresponding dose-response binding curves for the binding of each of the HiE constructs to EYFP-HiID in an MST assay. K<sub>d</sub> affinity values were calculated from two repeat measurements and an MST on-time of 1.5 seconds used for analysis.

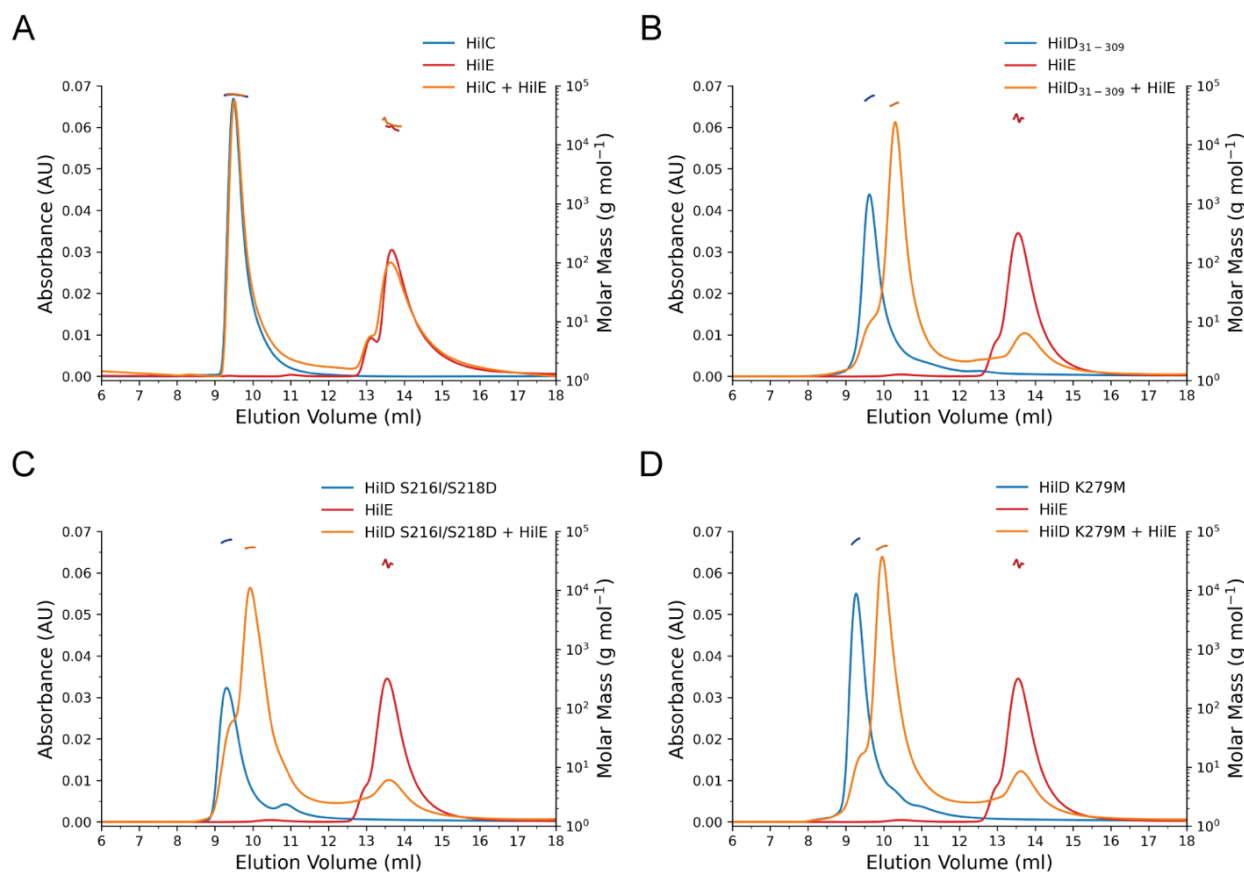

**Figure S8. Additional SEC-MALS experiments.** Analogous SEC-MALS experiments were performed for HiIE and (A) HiIC, (B) HiID construct lacking the disordered N-terminus (HiID<sub>31-309</sub>), (C) HiID S216D/S218I, (D) HiID K279M. Protein concentrations of 50  $\mu$ M were used for all samples, due to the lower solubility and observed precipitation of HiIC and HiID truncations at higher concentrations. Molecular weight values were calculated from 3 repeat experiments and are displayed in Table S2.

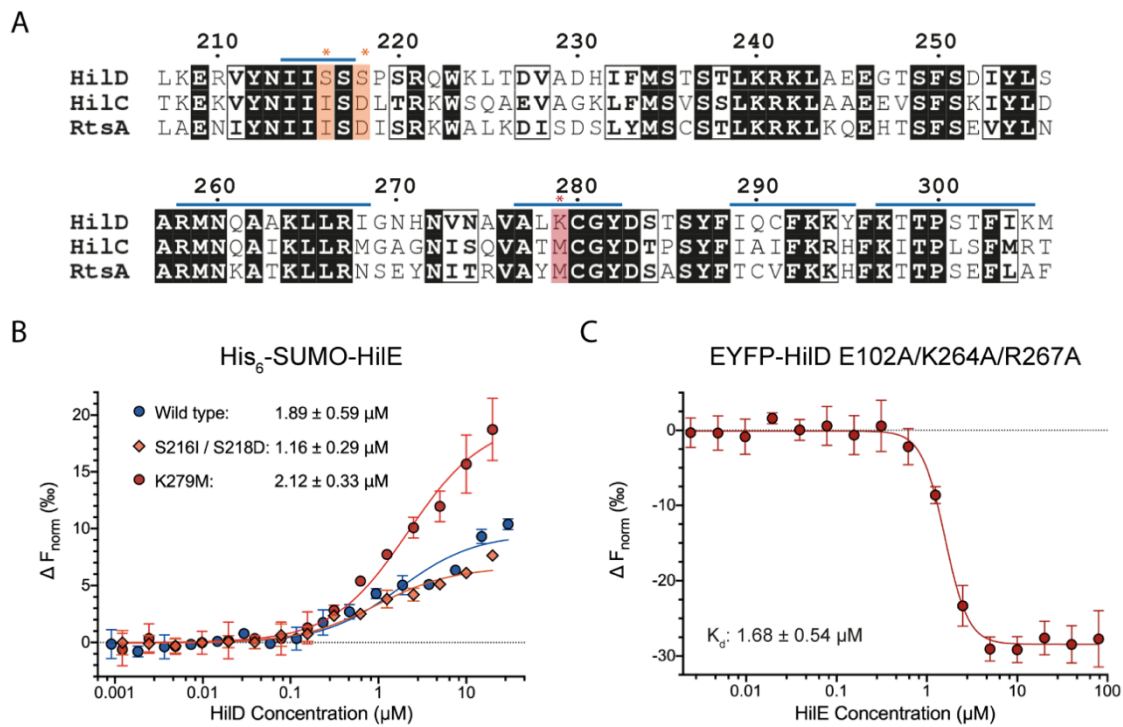

**Figure S9. Mutations in the HilD fatty acid binding pocket or DNA-binding domain do not affect binding affinity to HilE.** (A) Sequence alignment of the DNA-binding domains of HilD, HilC and RtsA, performed using ClustalΩ. Residues showing decreased HDX upon HilE binding are denoted by blue lines. HilD residues were selected for mutational analysis based on conservation in HilC and RtsA, but not HilD, and are highlighted. (B) MST dose-response curves for the binding of HilD mutants to HilE. His<sub>6</sub>-SUMO-HilE (100 nM) was labelled using the RED-tris-NTA dye and incubated with increasing concentrations of each of the HilD mutants. (C) MST dose-response curve for the binding of HilE to the EYFP-HilD E102A/K264A/R267A triple mutant. In both (B) and (C), K<sub>d</sub> values were calculated from changes in thermophoresis at 1.5 seconds on-time and data represent the mean ± SD of 3 replicates.

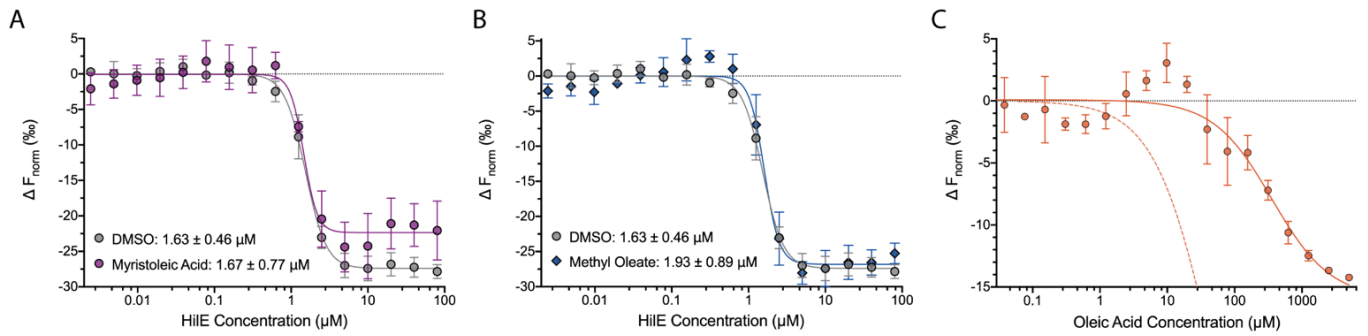

**Figure S10. (Related to Fig. 7). Binding of HiID and HiIE in presence of LCFAs. (A-B)** MST dose-response curves for binding to HiIE to HiID, at an MST on-time of 1.5 seconds. EYFP-HiID was incubated with 100  $\mu\text{M}$  of either **(A)** myristoleic acid (purple) or **(B)** methyl oleate (blue), followed by varying concentrations of HiIE. Binding of HiID and HiIE after incubation with 1% DMSO (grey) is shown for reference. Data represent the mean  $\pm$  SD of  $n=3$  (methyl oleate) or  $n=4$  (DMSO, myristoleic acid) replicates. **(C)** Oleic acid was titrated against a complex of HiID-HiIE, constituted by mixing EYFP-HiID (50 nM) with HiIE (10  $\mu\text{M}$ ). The dashed orange line shows the fitted binding curve for oleic acid binding to HiID alone (in the presence of Pluronic, see Fig. S4). Data shows changes in thermophoresis at an MST on-time of 1.5 seconds and represents the mean  $\pm$  SD of 4 replicates.

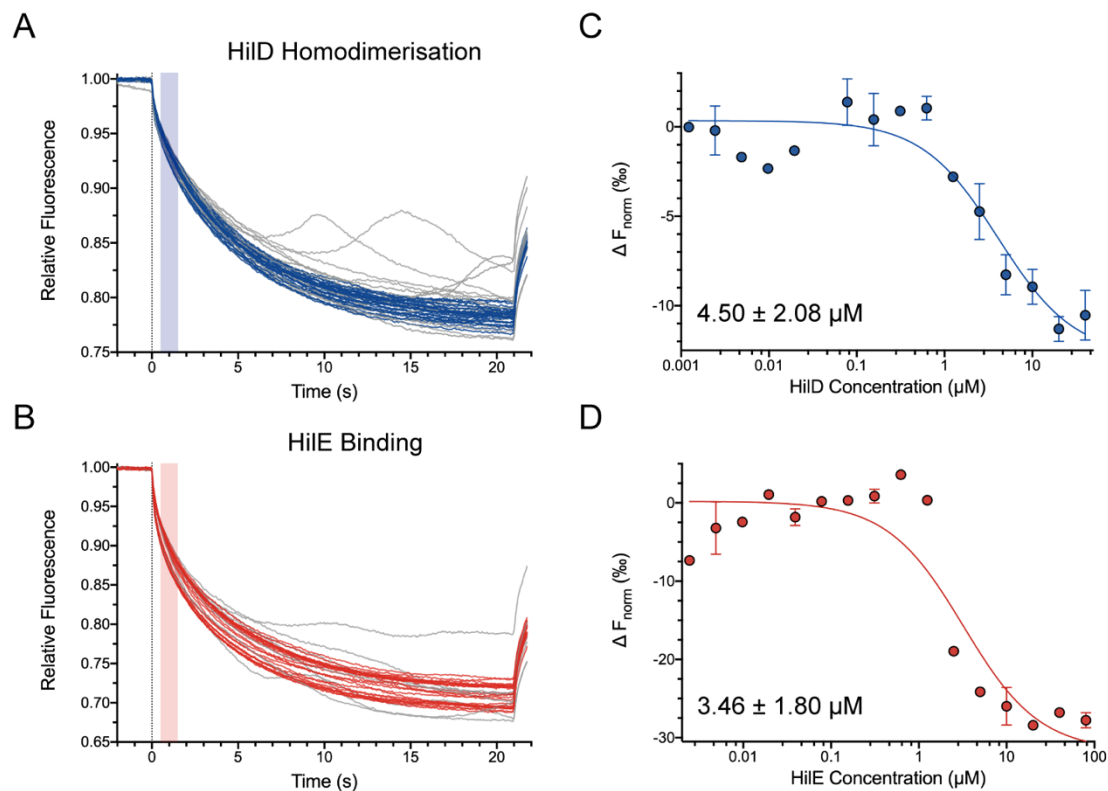

**Figure S11. Pluronic does not affect HiID homodimerisation or HiIE binding MST measurements. (A-B)** Raw MST traces for **(A)** HiID homodimerisation and **(B)** HiIE binding to HiID in the absence of Pluronic. Data are shown for  $n=3$  (A) or  $n=2$  (B) replicate MST runs. Individual MST traces for samples that showed aggregation or adsorption are coloured in grey and were excluded from subsequent data analysis. **(C-D)** Dose-response plots for **(C)** HiID homodimerisation and **(D)** HiIE binding.  $K_d$  values were determined from changes in thermophoresis at an MST on-time of 1.5 seconds, highlighted by the shaded region in (A) and (B). Data represents the mean  $\pm$  SD of  $n=3$  (C) or  $n=2$  (D) replicates, calculated from the MST traces shown in (A) and (B), respectively.
